# Supplementary material for: Consecutive lipase immobilization and glycerol carbonate production under continuous-flow conditions
Source: Royal Society of Chemistry journal article supplement (doi:10.1039/c6cy00295a), 2016-01-01
Supplement: c6cy00295a1.pdf [file c6cy00295a1.pdf]

# Consecutive Lipase Immobilization and Glycerol Carbonate Production under Continuous-Flow Condition

Raquel A. C. Leão,<sup>1</sup> Stefânia P. de Souza,<sup>1</sup> Daniel O. Nogueira,<sup>1</sup> Guilherme  
Maxwell,<sup>1</sup> Marcus Mattos,<sup>1</sup> Melissa L. E. Gutarra,<sup>2,3</sup> Leandro S. M. Miranda,<sup>1</sup>

Aline M. Castro,<sup>4</sup> Ivaldo I. Junior,<sup>2\*</sup>

Rodrigo O. M. A. de Souza.<sup>1\*</sup>

1. Biocatalysis and Organic Synthesis Group, Chemistry Institute, Federal University of Rio de Janeiro, CEP 22941-909, Rio de Janeiro, Brazil;
2. Department of Biochemical Engineering, School of Chemistry, Federal University of Rio de Janeiro, CEP 21941-909, Rio de Janeiro, Brazil;
3. Federal University of Rio de Janeiro, *Campus Xerém*, CEP 25245-390, Duque de Caxias, Brazil;
4. Biotechnology Division, Research and Development Center, PETROBRAS, CEP 21941-915, Rio de Janeiro, Brazil.

## Support Information

## 1. Details on Reaction optimization

Aiming to develop a better method in terms of selectivity we decided to move forward our studies to investigate the use of surfactants on the glycerol carbonate reaction since in the beginning of our work we have identified that the reaction conditions applied were biphasic and the use of surfactants could help on producing a more homogeneous reaction media. Initially we have investigated the reactions catalyzed by Novozym 435 and after, applied the best reaction conditions to our *Candida antarctica* lipase B immobilized on Accurel MP1000 resin.

We have screened several surfactants at reaction times of 48 hours, analyzing conversion and selectivity obtained in each case. In addition to the solvent free system, we have also tested a few organic solvents such as acetonitrile, tert-butanol and tetrahydrofuran (THF). The obtained results are summarized on Table 2.

**Table S1:** Evaluation of surfactants and solvents on the enzymatic synthesis of GC catalyzed by Novozym 435.

| Surfactants | Solvent free |         | Acetonitrile |         | <i>t</i> - Butanol |         | THF      |         |
|-------------|--------------|---------|--------------|---------|--------------------|---------|----------|---------|
|             | Conv (%)     | sel (%) | Conv (%)     | sel (%) | Conv (%)           | sel (%) | Conv (%) | sel (%) |
| AOT         | 43           | 47      | 32           | 0       | 11                 | 18      | 27       | 45      |
| SDS         | 62           | 57      | 20           | 68      | 0                  | 0       | 9        | 59      |
| Brij        | 64           | 67      | 50           | 55      | 41                 | 74      | 54       | 53      |
| Brij 35     | 57           | 8       | 24           | 0       | 38                 | 5       | 0        | 0       |
| Brij 52     | 66           | 35      | 80           | 22      | 39                 | 25      | 55       | 24      |
| Brij 58     | 66           | 39      | 51           | 30      | 27                 | 32      | 23       | 24      |
| Brij 76     | 61           | 55      | 33           | 43      | 0                  | 0       | 56       | 41      |
| Brij 78     | 62           | 55      | 33           | 43      | 9                  | 34      | 49       | 43      |
| Brij 98     | 62           | 39      | 55           | 26      | 31                 | 26      | 51       | 29      |

\*conversion and selectivity measured by GC-MS, following the reference [26]. Reaction Conditions: Glycerol: DMC (3 mmol: 9 mmol), 20% of immobilized enzyme, 15% of surfactants, 1 mL of solvents, 60° C, 200 rpm and 48 hours.

As can be observed by the results presented on Table S2, the solvent free system in general presented the best combination between conversion and selectivity towards glycerol carbonate production and the selectivity obtained under these conditions are much higher than the ones obtained on the system without surfactants indicating that homogeneity of reaction media can be an important factor for selective issues.

To evaluate the estimated effects of several variables in this reaction system, as well as to optimize reaction conditions, a three level factorial design was carried out to compare the performance of the four selected surfactants (SDS, Brij, Brij 76 and Brij 78) in the synthesis of glycerol carbonate under *Candida antarctica* lipase B immobilized on Accurel MP1000 resin catalysis. For each surfactant one design of experiments was employed, resulting in 29 experiments for each surfactant (Table S3) where enzyme concentration, surfactant concentration and glycerol/DMC molar ratio were evaluated.

**Table S2.** Real and coded values

| Variable                 | -1  | 0    | +1  |
|--------------------------|-----|------|-----|
| Enzyme (%)               | 5   | 12,5 | 20  |
| Surfactant (%)           | 5   | 10   | 15  |
| Molar ratio<br>(Gli:DMC) | 1:1 | 1:2  | 1:3 |

Reaction Conditions: Temperature (60° C) and stirring (200 rpm) for 48 hours

**Table S3:** Experimental factorial design 3<sup>3</sup> with levels of studied variables and conversion results for each surfactant from the reaction catalyzed by *Candida antarctica* lipase B immobilized on Accurel MP100.

| Entry | Enzyme<br>(% w/v) | Surfactant<br>(%) | Gly/DMC | Conversion (%) |      |         |         |
|-------|-------------------|-------------------|---------|----------------|------|---------|---------|
|       |                   |                   |         | SDS            | BRIJ | BRIJ 76 | BRIJ 78 |
| 1     | 5                 | 5                 | 1:1     | 10             | 50   | 14      | 58      |

|    |      |    |     |    |    |    |    |
|----|------|----|-----|----|----|----|----|
| 2  | 12.5 | 5  | 1:1 | 34 | 55 | 20 | 43 |
| 3  | 20   | 5  | 1:1 | 9  | 10 | 22 | 47 |
| 4  | 5    | 10 | 1:1 | 15 | 44 | 39 | 54 |
| 5  | 12.5 | 10 | 1:1 | 26 | 53 | 47 | 55 |
| 6  | 20   | 10 | 1:1 | 25 | 11 | 19 | 33 |
| 7  | 5    | 15 | 1:1 | 37 | 37 | 54 | 28 |
| 8  | 12.5 | 15 | 1:1 | 45 | 51 | 22 | 32 |
| 9  | 20   | 15 | 1:1 | 43 | 22 | 20 | 35 |
| 10 | 5    | 5  | 1:2 | 33 | 49 | 59 | 53 |
| 11 | 12.5 | 5  | 1:2 | 49 | 53 | 61 | 25 |
| 12 | 20   | 5  | 1:2 | 54 | 19 | 62 | 34 |
| 13 | 5    | 10 | 1:2 | 41 | 49 | 59 | 51 |
| 14 | 12.5 | 10 | 1:2 | 29 | 40 | 66 | 58 |
| 15 | 12.5 | 10 | 1:2 | 30 | 37 | 60 | 59 |
| 16 | 12.5 | 10 | 1:2 | 26 | 36 | 58 | 62 |
| 17 | 20   | 10 | 1:2 | 51 | 12 | 65 | 29 |
| 18 | 5    | 15 | 1:2 | 48 | 51 | 57 | 37 |
| 19 | 12.5 | 15 | 1:2 | 48 | 50 | 59 | 30 |
| 20 | 20   | 15 | 1:2 | 50 | 49 | 63 | 29 |
| 21 | 5    | 5  | 1:3 | 40 | 52 | 61 | 49 |
| 22 | 12.5 | 5  | 1:3 | 45 | 51 | 62 | 36 |
| 23 | 20   | 5  | 1:3 | 57 | 51 | 64 | 34 |
| 24 | 5    | 10 | 1:3 | 43 | 48 | 63 | 48 |
| 25 | 12.5 | 10 | 1:3 | 53 | 48 | 63 | 28 |
| 26 | 20   | 10 | 1:3 | 53 | 52 | 69 | 49 |
| 27 | 5    | 15 | 1:3 | 45 | 45 | 60 | 37 |
| 28 | 12.5 | 15 | 1:3 | 52 | 46 | 63 | 31 |
| 29 | 20   | 15 | 1:3 | 48 | 47 | 70 | 29 |

---

\*conversion and selectivity measured by GC-MS [26]. Reaction Conditions: 60° C and 200 rpm for 48 hours.

From the analysis of the estimated effects for the reaction with SDS and Brij it was observed that the molar ratio between glycerol and DMC was the most significant variable, suggesting that higher conversions can be achieved at higher molar ratios (within the range

studied), according to Pareto graphs (Figures S1, S2, S3 and S4). The difference between SDS and Brij is related to the amount of surfactant needed to achieve good conversions, where Brij is more efficient with low amounts of surfactant.

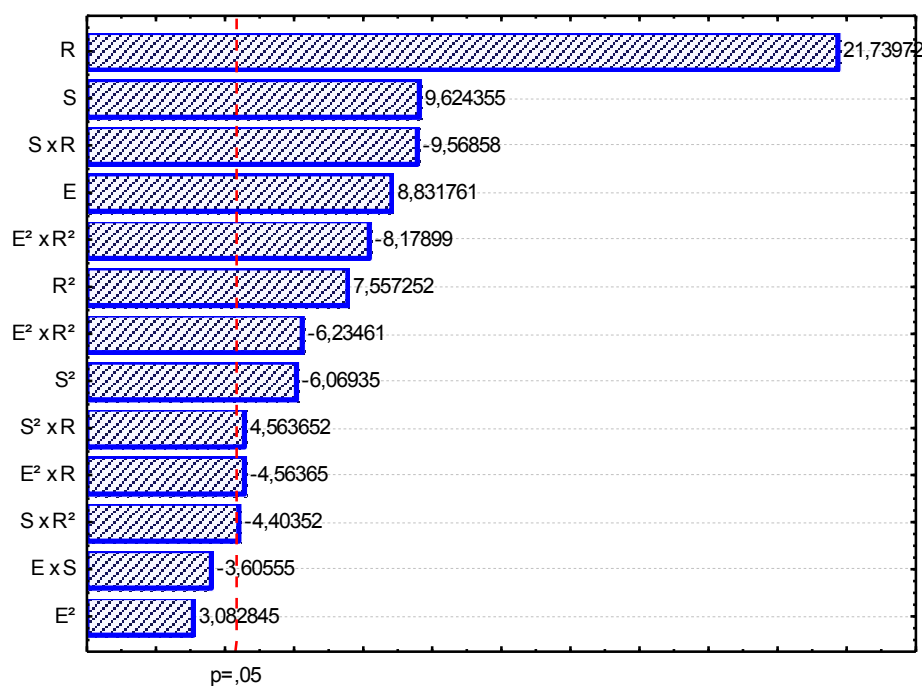

**Figure S1.** Pareto chart for the estimated effects on the reaction performed in the presence of SDS as surfactant.

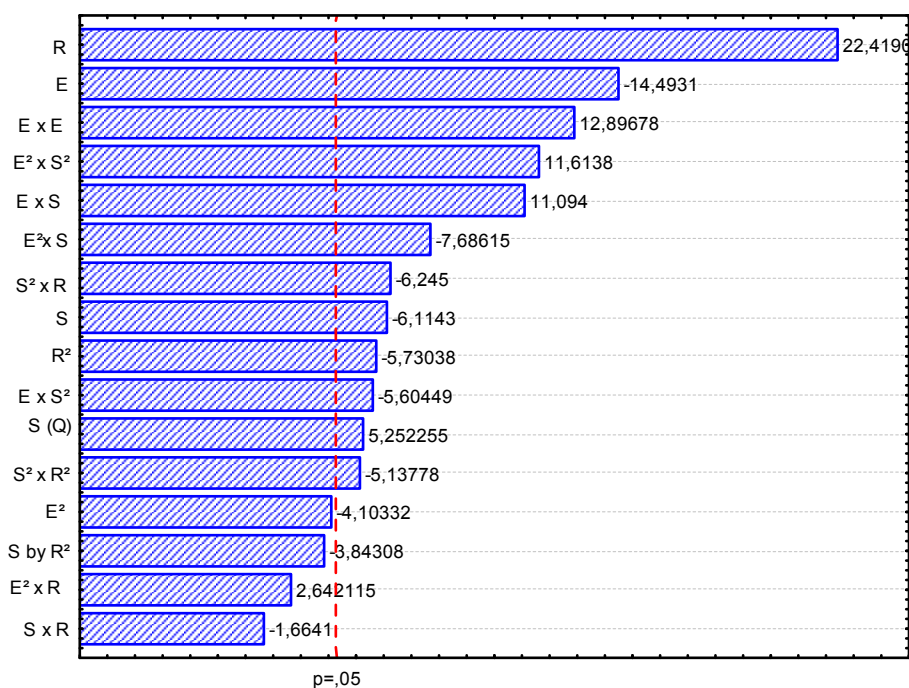

**Figure S2.** Pareto chart for the estimated effects on the reaction performed in the presence of Brij as surfactant.

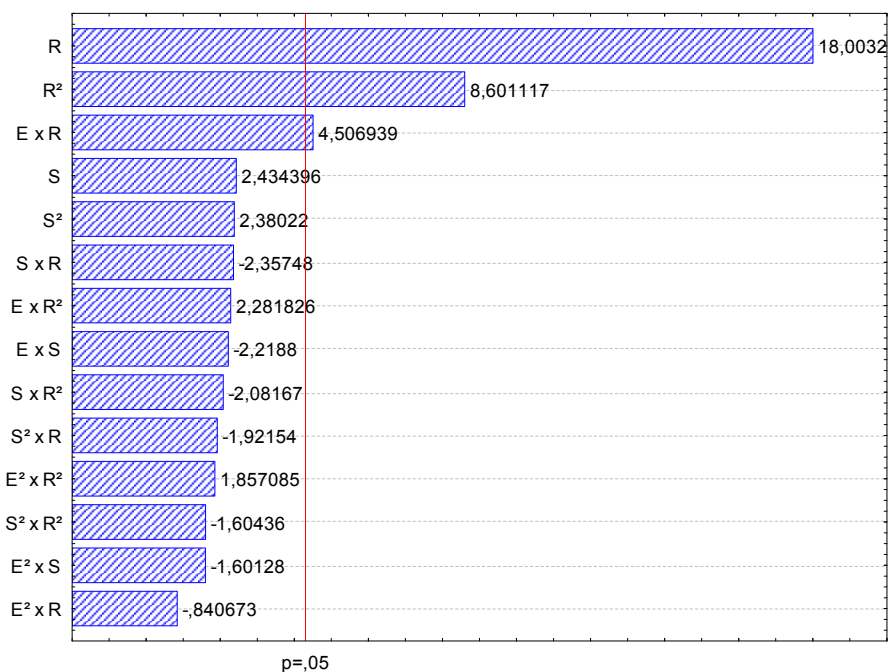

**Figure S3.** Pareto chart for the estimated effects on the reaction performed in the presence of Brij 76 as surfactant.

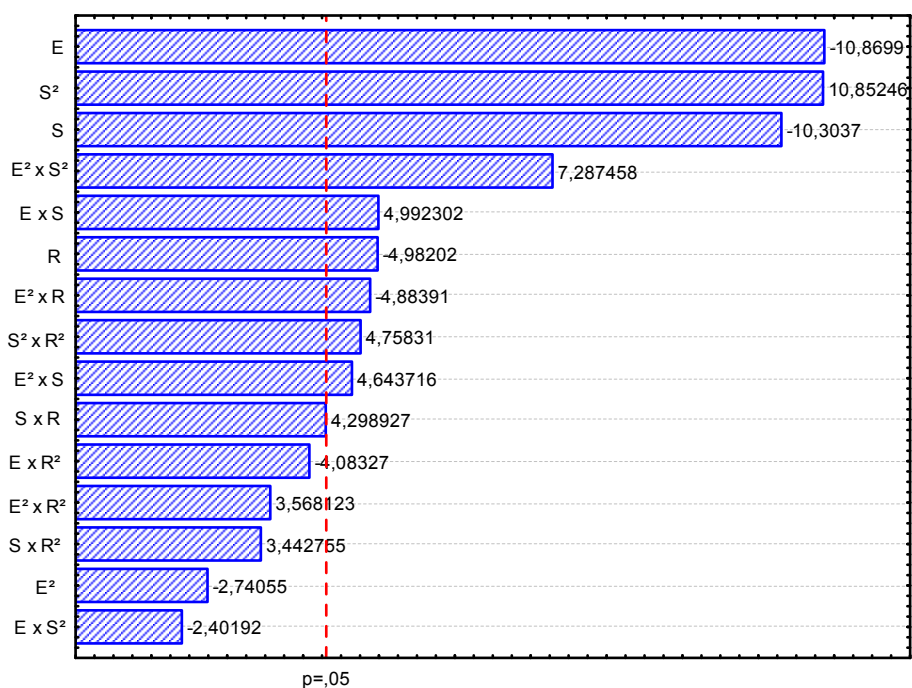

**Figure S4.** Pareto chart for the estimated effects on the reaction performed in the presence of Brij 78 as surfactant.

For reactions with Brij 76, the molar ratio clearly showed to be the most significant variable both, in its linear and quadratic terms. All other variables showed no significant influence. For Brij 78 the amount of enzyme was the most significant variable along with the amount of surfactant. The response surfaces of the studied variables can be observed in Figure S5.

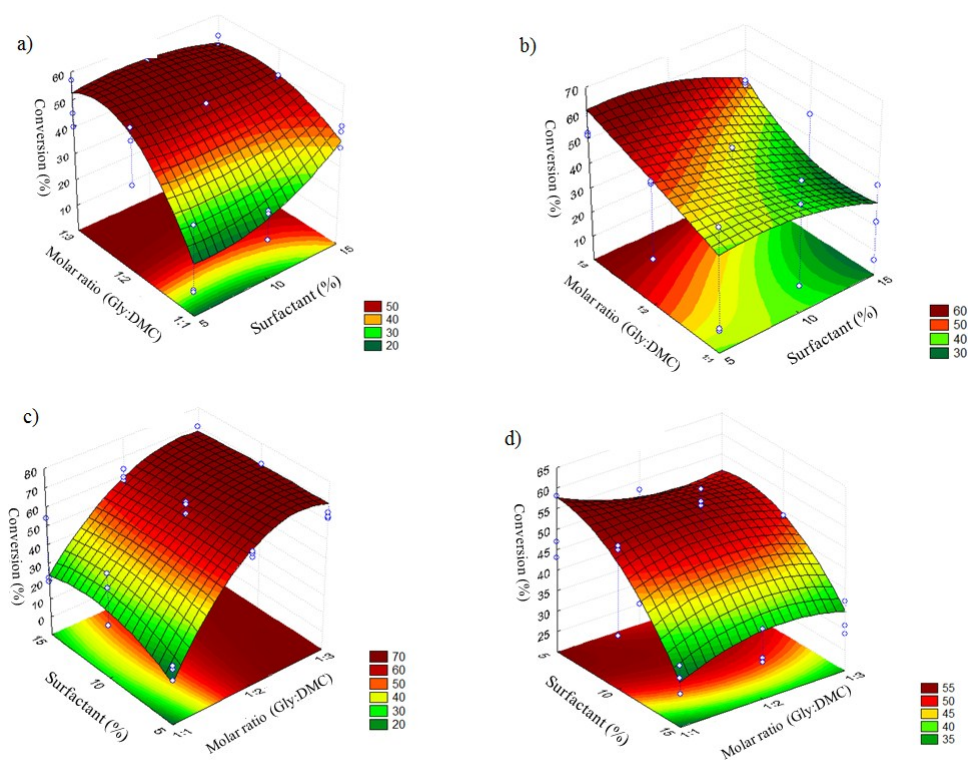

**Figure S5:** Response surfaces of glycerol carbonate synthesis in the presence of different surfactants: (a) SDS, (b) Brij, (c) Brij 76 and (d) Brij 78.

The validation of the mathematical model for the reactions with each surfactant was performed by analysis of variance (ANOVA) and  $R^2$  parameter. For all surfactants studied, calculated F values were higher than F values tabulated, showing the validity of the model.

The high coefficients of determination for SDS ( $R^2 = 0.89$ ), Brij ( $R^2 = 0.79$ ), Brij 76 ( $R^2 = 0.92$ ) and Brij ( $R^2 = 0.78$ ) show that the mathematical models satisfactorily explain the data obtained (Table S4, S5, S6 and S7).

**Table S4.** Analysis of variance (ANOVA) for the reaction carried out with SDS as surfactant.

| <b>Factor</b>         | <b>Sum of Squares</b> | <b>Liberty Degrees</b> | <b>Mean Square</b> | <b>F Calculated</b> | <b>F tabulated</b> | <b>P value</b> |
|-----------------------|-----------------------|------------------------|--------------------|---------------------|--------------------|----------------|
| <b>Regression</b>     | 4441,358              | 13                     | 394,8947           | 9,9231              | 2,448              | 0,000039       |
| <b>Residue</b>        | 516,435               | 15                     | 36,11478           |                     |                    |                |
| <b>Lack of adjust</b> | 507,768               | 13                     | 40,35231           |                     |                    |                |
| <b>Pure Error</b>     | 8,667                 | 2                      | 4,333333           |                     |                    |                |
| <b>TOTAL</b>          | 4957,793              | 28                     |                    |                     |                    |                |

**Table S5.** Analysis of variance (ANOVA) for the reaction carried out with Brij as surfactant.

| <b>Factor</b>         | <b>Sum of Squares</b> | <b>Liberty Degrees</b> | <b>Mean Square</b> | <b>F Calculated</b> | <b>F Tabulated</b> | <b>P value</b> |
|-----------------------|-----------------------|------------------------|--------------------|---------------------|--------------------|----------------|
| <b>Regression</b>     | 6093,66828            | 16                     | 380,854267         | 2,8970              | 2,602              | 0,034119       |
| <b>Residue</b>        | 1577,5731             | 12                     | 131,464425         |                     |                    |                |
| <b>Lack of adjust</b> | 1568,906              | 10                     | 156,890643         |                     |                    |                |
| <b>Pure Error</b>     | 8,667                 | 2                      | 4,33333333         |                     |                    |                |
| <b>TOTAL</b>          | 7671,241              | 28                     |                    |                     |                    |                |

**Table S6.** Analysis of variance (ANOVA) for the reaction carried out with Brij 76 as surfactant.

| <b>Fator</b>      | <b>Sum of Squares s</b> | <b>Liberty Degrees</b> | <b>Mean Square</b> | <b>F Calculated</b> | <b>F Tabulated</b> | <b>P value</b> |
|-------------------|-------------------------|------------------------|--------------------|---------------------|--------------------|----------------|
| <b>Regression</b> | 8188,91674              | 14                     | 584,922624         | 11,8269             | 2,484              | 0,000020       |



|                       |            |    |            |
|-----------------------|------------|----|------------|
| <b>Residue</b>        | 692,393606 | 14 | 49,4566861 |
| <b>Lack of adjust</b> | 657,727    | 12 | 54,8105783 |
| <b>Pure Error</b>     | 34,667     | 2  | 17,3333333 |
| <b>TOTAL</b>          | 8881,310   | 28 |            |

---

**Table S7.** Analysis of variance (ANOVA) for the reaction carried out with Brij 78 as surfactant.

| <b>Factor</b>         | <b>Sum of Squares</b> | <b>Liberty Degrees</b> | <b>Mean Square</b> | <b>F Calculated</b> | <b>F tabulated</b> | <b>P value</b> |
|-----------------------|-----------------------|------------------------|--------------------|---------------------|--------------------|----------------|
| <b>Regression</b>     | 2936,44463            | 15                     | 195,762976         | 3,1225              | 2,533              | 0,022876       |
| <b>Residue</b>        | 815,003643            | 13                     | 62,6925879         |                     |                    |                |
| <b>Lack of adjust</b> | 806,337               | 11                     | 73,3033615         |                     |                    |                |
| <b>Pure Error</b>     | 8,667                 | 2                      | 4,33333333         |                     |                    |                |
| <b>TOTAL</b>          | 3751,448              | 28                     |                    |                     |                    |                |

---
